# Supplementary material for: Loliginid paralarvae from the Southeastern Gulf of Mexico: Abundance, distribution, and genetic structure
Source: Frontiers journal article supplement (doi:10.3389/fmars.2022.941908), 2022-08-10
Supplement: Table_1.DOCX [file Table_1.DOCX]

# Supplementary Tables

**Table S1** GenBank Accession Number and reference of the DNA sequences of each loliginid species whose geographical distribution is within the Gulf of Mexico and the DNA sequence used as an outgroup for the phylogenetic reconstruction.

| **Species** |  | **Accession Number** |  | **Reference** |
| --- | --- | --- | --- | --- |
| *D. pealeii* |  | HQ978731.1  KF854065.1 |  | iBOL Data Release  Sales et al. 2013 |
| *L. brevis* |  | KU906111.1  MG582542.1 |  | Aguilar et al. unpublished  Díaz-Santana-Iturrios et al. 2019 |
| *S. sepioidea* |  | KF854085.1  AF075392.1 |  | Sales et al. 2013  Anderson 2000 |
| *D. pleii* |  | KF85061.1  KF85062.1  KF85063.1  KF85051.1  KF85052.1 |  | Sales et al. 2013 |
| AF207945.2  AF207946.2  AF207947.2  AY039619.1  AY039620.1 | Herke and Foltz 2002 |
| MG582565.1  MG582566.1  MG582573.1  MG582574.1 | Díaz-Santana-Iturrios et al. 2019 |
| *D. gigas* |  | MK336952.1 |  | iBOL Data Release |

**Table S2** *Doryteuthis pleii* paralarvae (PL) and adults haplotypes frequency by zone. The percentage of similarity with the species in BOLD-IDS and the GenBank Accession Number of the new DNA sequences.

| **Haplotype** | **Frequency** | **Zone** | **PL** | **Adult** | **BOLD Similarity** | **GenBank accession number** |
| --- | --- | --- | --- | --- | --- | --- |
| 1 | 1 | West | 1 | - | 100 | MZ056807 |
| 2 | 3 | West | 1 | 2 | 99.82 | MZ056808 |
| 3 | 44 | West | 13 | 10 | 100 | MZ056809 |
| Center | 5 | 8 |
| East |  | 8 |
| 4 | 1 | West | 1 | - | 100 | MZ056810 |
| 5 | 1 | West | 1 | - | 99.82 | MZ056811 |
| 6 | 1 | West | 1 | - | 99.83 | MZ056812 |
| 7 | 1 | West | 1 | - | 99.83 | MZ056813 |
| 8 | 8 | West | 1 | - | 99.82 | MZ056845 |
| 9 | 3 | West | 1 | 1 | 100 | MZ056814 |
| Center |  | 1 |
| 10 | 1 | West | 1 | - | 100 | MZ056815 |
| 11 | 3 | West | 1 |  | 100 | MZ056816 |
| 3 | Center |  | 2 |
| 12 | 2 | West | 1 | - | 99.82 | MZ056817 |
| 2 | Center | 1 | - |
| 13 | 1 | Center | 1 | - | 99.65 | MZ056818 |
| 14 | 1 | Center | 1 | - | 99.64 | MZ056819 |
| 15 | 1 | Center | 1 | - | 99.83 | MZ056820 |
| 16 | 1 | Center | 1 | - | 99.82 | MZ056821 |
| 17 | 1 | Center | 1 | - | 100 | MZ056822 |
| 18 | 1 | East | - | 1 | 99.46 | MZ056823 |
| 19 | 1 | East | - | 1 | 99.64 | MZ056824 |
| 20 | 1 | East | - | 1 | 100 | MZ056825 |
| 21 | 1 | East | - | 1 | 99.82 | MZ056826 |
| 22 | 1 | East | - | 1 | 99.82 | MZ056827 |
| 23 | 1 | East | - | 1 | 99.64 | MZ056828 |
| 24 | 1 | East | - | 1 | 99.82 | MZ056829 |
| 25 | 1 | East | - | 1 | 99.82 | MZ056830 |
| 26 | 3 | West | - | 2 | 99.82 | MZ056831 |
| Center | - | 1 |
| 27 | 1 | Center |  | 1 | 99.82 | MZ056832 |
| 28 | 1 | Center |  | 1 | 100 | MZ056833 |
| 29 | 1 | Center |  | 1 | 99.82 | MZ056834 |
| 30 | 1 | West |  | 1 | 100 | MZ056835 |
| 31 | 1 | West |  | 1 | 99.82 | MZ056836 |
| 32 | 1 | West |  | 1 | 99.82 | MZ056837 |
| 33 | 1 | West |  | 1 | 99.82 | MZ056838 |
| 34 | 1 | West |  | 1 | 99.64 | MZ056839 |
| 35 | 1 | West |  | 1 | 100 | MZ056840 |
| 36 | 1 | West |  | 1 | 99.64 | MZ056841 |
| 37 | 1 | West |  | 1 | 99.82 | MZ056842 |
| 38 | 1 | West |  | 1 | 99.82 | MZ056843 |
| 39 | 1 | West |  | 1 | 99.82 | MZ056844 |
